# Supplementary material for: Schritt für Schritt zur Klimaneutralität in der Klinik
Source: Springer Nature journal article supplement (doi:10.1007/s43877-023-0785-2), 2023-07-01
Supplement: MOESM1 [file 25596882]

## Literatur

### zum Beitrag „Schritt für Schritt zur Klimaneutralität in der Klinik“

von Viola Clement

HebammenWissen (4) 4/2023, S. 10–13

Bundesärztekammer (2021) CO<sub>2</sub>-Fußabdruck Gesundheitssektor; <https://tinyurl.com/2thup7mk> (letzter Zugriff: 26.5.2023)

Bundesministerium für Umwelt, Naturschutz, nukleare Sicherheit und Verbraucherschutz (2015) Übereinkommen von Paris; <https://tinyurl.com/ys52t6rn> (letzter Zugriff: 26.5.2023)

Crutzen PJ, Mosier AR, Smith KA, Winiwarter W (2008) N<sub>2</sub>O Release from Agro-biofuel Production Negates Global Warming Reduction by Re-placing Fossil Fuels. Atmos Chem Phys 8(2) 389-95

EAT-Lancet Commission on Food, Planet and Health (2019) Summary Report – Healthy Diets from Sustainable Food Systems; <https://tinyurl.com/ap36k369> (letzter Zugriff: 26.5.2023)

Hankeln U (2022) Vermeiden, Reduzieren, Wiederverwerten: Aktuelle und künftige Entsorgungskonzepte im klinischen Alltag. In: Werner JA, Kaatz T, Schmidt-Rumposch A (Hrsg.) Green Hospital – Nachhaltigkeit und Ressourcenschonung im Krankenhaus. Berlin: Medizinisch Wissenschaftliche -Verlagsgesellschaft.

Health Care Without Harm (2019) Health Care's Climate -Footprint; <https://tinyurl.com/4z9wrxka> (letzter Zugriff: 26.5.2023)

Intergovernmental Panel on Climate Change (2023) Summary for Policymakers. In: Climate Change 2023: Synthesis Report; <https://tinyurl.com/bdzhknf6> (letzter Zugriff: 26.5.2023)

Schulz C, Lehmann F (2022) Geburten müssen Klimaproblem nicht verschärfen; <https://tinyurl.com/mrw2c3mm> (letzter Zugriff: 26.5.2023)

Stiftung Münch (2023) Energieeffizienz im Krankenhaus – -Handlungsleitfaden zu energiesparenden Ansätzen und -Technologien; <https://tinyurl.com/2p99bnwa>

Sulbaek Andersen MP, Nielsen OJ, Wallington TJ, Karpichev B, Sander SP (2012) Medical intelligence article: assessing the impact on global climate from general anesthetic gases. Anesth Analg 114(5) 1081-5

Umweltbundesamt (2023) Verpackungsabfälle; <https://tinyurl.com/5n89fch4> (letzter Zugriff 26.5.2023)

University of Reading (2023) #ShowYourStripes; <https://showyourstripes.info/> (letzter Zugriff am 26.5.2023)

Viamedica (2023) Energiesparfibel – Krankenhausmitarbeiter schützen das Klima; <https://tinyurl.com/4rnc7z9h> (letzter Zugriff: 26.5.2023)

Viamedica (2023) Klinergie – Energieeffizienz und Nachhaltigkeit für Einrichtungen des Gesundheitswesens; <https://www.viamedica-stiftung.de/klinergie> (letzter Zugriff: 26.5.2023)
